# Supplementary material
Source: publisher site journal article supplement (https://www.dovepress.com/article/369670)
Supplement: Supplementary file 1 [file get_supplementary_file.php]

**Figure S1**. Decreased expression of MAL2 enhances the migration and invasion of tumor cells. **A.** Cell migration assays in MAL2-KD and control cells (left panel, representative pictures of transwell chambers; right panel, average counts of five random microscopic fields at a magnification of 100×, *P* < 0.0001, *t*-test). **B.** Cell invasion assays in MAL2-KD and control cells (left panel, representative pictures of transwell chambers; right panel, average counts of five random microscopic fields at a magnification of 100×, *P* < 0.0001, *t*-test).
